# Supplementary material for: Green Synthesis of Highly Fluorescent Carbon Dots from Bovine Serum Albumin for Linezolid Drug Delivery as Potential Wound Healing Biomaterial: Bio-Synergistic Approach, Antibacterial Activity, and In Vitro and Ex Vivo Evaluation
Source: MDPI journal article supplement (doi:10.3390/pharmaceutics15010234), 2023-01-10
Supplement: s1 [file s1]

---

*Supplementary Materials*

# **Green Synthesis of Highly Fluorescent Carbon Dots from Bovine Serum Albumin for Linezolid Drug Delivery as Potential Wound Healing Biomaterial: Bio-Synergistic Approach, Antibacterial Activity, and In Vitro and Ex Vivo Evaluation**

Dina Saeed Ghataty, Reham Ibrahim Amer, Mai A. Amer, Mohamed F. Abdel Rahman  
and Rehab Nabil Shamma

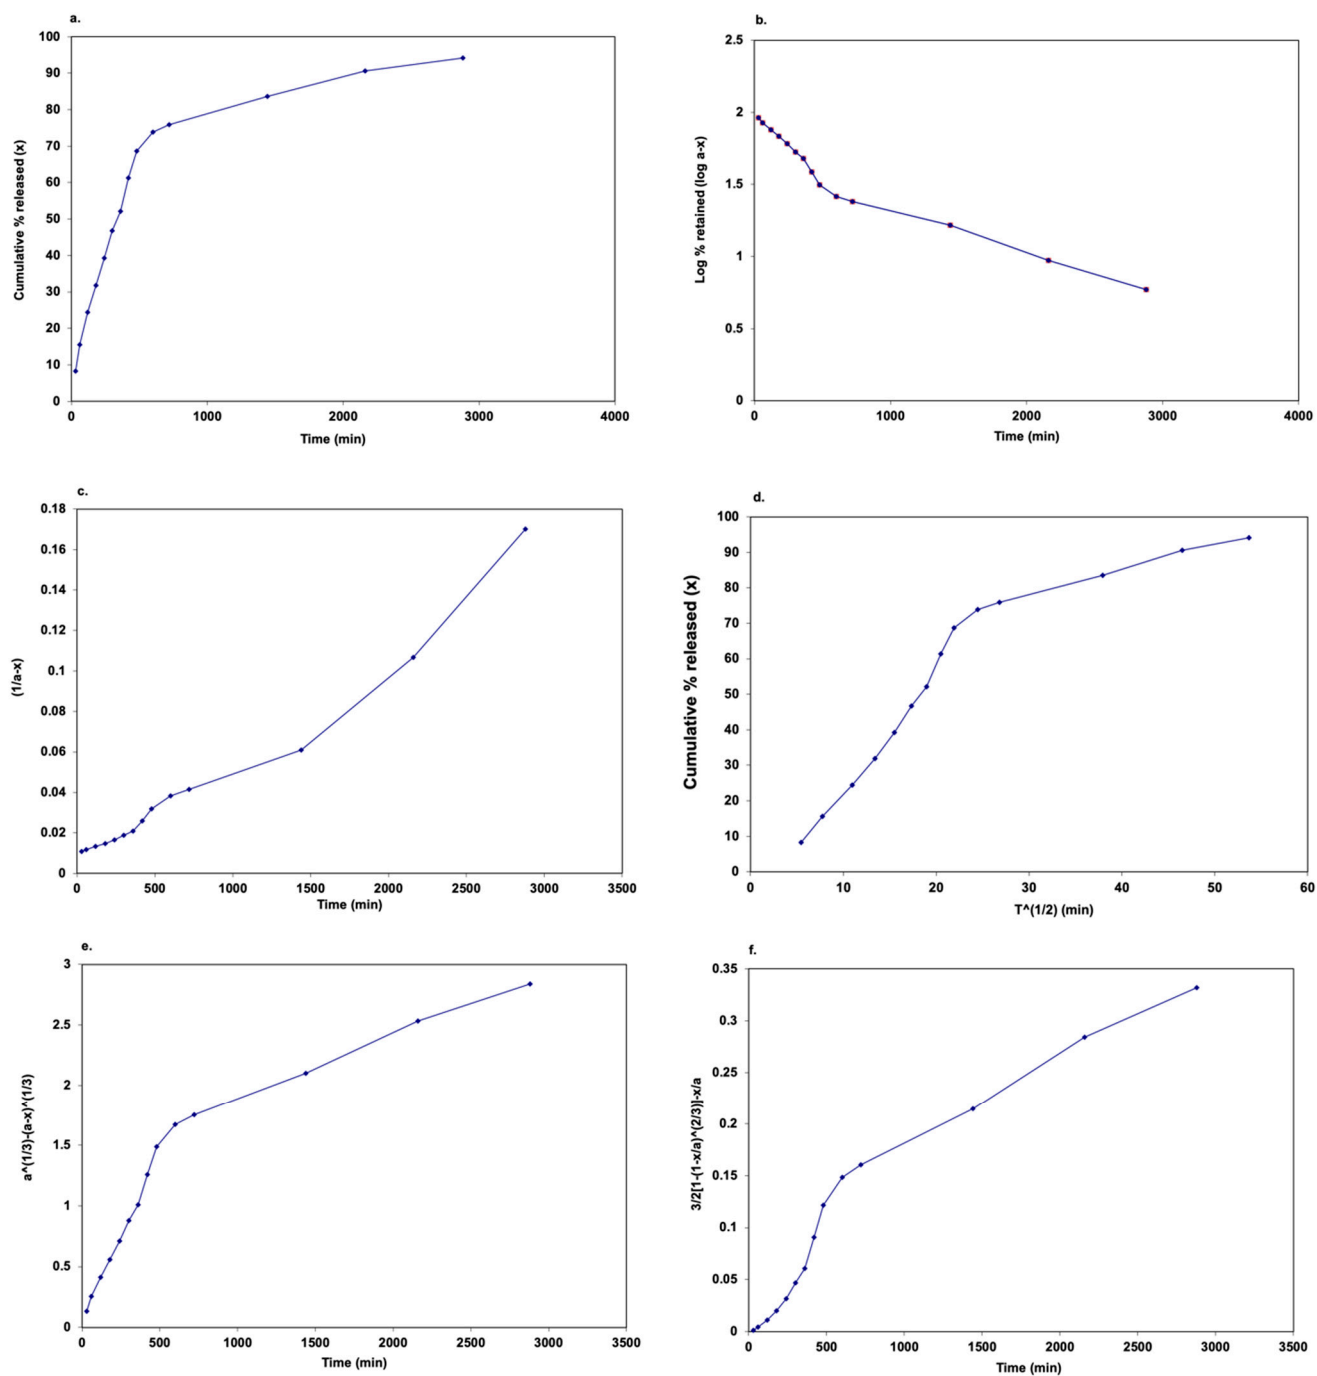

**Figure S1.** Drug release kinetics of (a) Zero order, (b) First order, (c) Second order, (d) Higuchi diffusion, (e) Hixon-Crowel, and (f) Baker-Lonsdal kinetic models for the release of LNZ from (1:1) LNZ-BCDs nano-bioconjugate.
